# Supplementary material
Source: ML conference proceedings conference paper supplement (https://proceedings.neurips.cc/paper_files/paper/2023/hash/464fefa022aaefc85d901317bbf13f85-Abstract.html)
Supplement: Supplementary file 1 [file 464fefa022aaefc85d901317bbf13f85-Supplemental-Datasets_and_Benchmarks.pdf]

## A Author Statement

The authors of this work would like to state that we bear full responsibility for any potential violation of rights, including copyright infringement or unauthorized use of data. We affirm our commitment to conducting this research in accordance with ethical guidelines and legal requirements.

We further guarantee that we will ensure access to the data<sup>4</sup> and the framework code<sup>5</sup> used in this study, making them available to interested researchers for verification and replication purposes. Additionally, we are committed to providing the necessary maintenance and support to ensure the longevity and accessibility of the data. For datasets, we have plans to consistently offer more datasets in the future. These datasets will include larger sizes for larger models, higher levels for expert agents, and novel design factors for other research directions. Updating our datasets is an ongoing and long-term effort, and we welcome contributions from the community. Regarding benchmarks, we will actively monitor the latest state-of-the-art (SOTA) algorithms in the offline RL domain and integrate them into our benchmarks. Additionally, we will develop new algorithms within the benchmarks based on existing datasets and baselines. This ensures that our benchmarks remain up-to-date and reflect the advancements in offline RL research.

Should any concerns or inquiries arise regarding the contents of this work or the associated data, we encourage readers and fellow researchers to contact us directly. We are dedicated to addressing any issues promptly and transparently to uphold the integrity of our research.

## B Limitations and Future Works

In our future endeavors, we plan to integrate our framework with a large-scale deep reinforcement learning platform namely *KaiwuDRL*, specifically designed to support Honor of Kings. By doing so, we will gain access to greater computational resources, enabling us to delve deeper into our current research endeavors and expand our investigations.

## C Datasets Details

### C.1 HoK1v1

Table 3 presents the details of datasets in HoK1v1 task. The datasets are collected by recording the battle trajectories of pre-trained models as described in Appendix F. Typically, each dataset has a capacity of 1000 trajectories. The default heroes chosen for both camps are *luban*, with its Summoner Spells set to *frenzy*. However, in specific scenarios such as *Generalization* or *Multi-Task* settings, we employ a random selection of heroes from a predefined set, *multi\_hero*. This set comprises five heroes, *{luban, diren jie, houyi, makeboluo, gongsunli}*, each with their Summoner Spells as *{frenzy, frenzy, frenzy, stun, frenzy}*, respectively. The win rate of the behavior policy is recorded in the column labeled *Win\_rate* for reference. The column labeled *Levels* denotes the levels of opponents used for evaluation. Generally, a level of "1" is used for datasets with the "norm" prefix, while a level of "5" is used for datasets with the "hard" prefix. This distinction indicates varying levels of difficulty.

In the *Generalization* category, "norm\_general" and "hard\_general," have their corresponding datasets. For example, to sample the "norm\_general" dataset, we let the level-1 model fight with level-0, level-2, and level-4 models. However, during the test stage, we assess the generalization capabilities of the trained model by letting it fight against the level-1 model. Details about how we sample the *generalization* datasets can be referred to Table. 7. The latter four experiments do not require extra datasets. For example, in the "norm\_hero\_general" experiment, we directly use the model trained on the "norm\_medium" dataset and let the model control different heroes. This is possible because the "norm\_medium" dataset only contains the fixed default hero "luban." Therefore, we use the model trained on this dataset to test its generalization ability at controlling different heroes.

<sup>4</sup><https://sites.google.com/view/hok-offline>

<sup>5</sup><https://github.com/tencent-ailab/hokoff>

In the *Sub-Task: Destroy Turret* category presented in Table 4, there are three datasets sampled, each consisting of 100 trajectories. Notably, these datasets lack an opponent hero, making them simpler in nature. This design choice allows for broad applicability, diversity, and cost-effectiveness in research endeavors.

The primary objective in the *Sub-Task: Destroy Turret* scenarios is to efficiently dismantle the enemy’s turret and crystal, with the enemy hero removed. Consequently, we adopt the number of game frames elapsed from the start of the game until the crystal’s destruction as our evaluation protocol. Equation 1 outlines the scoring methodology employed, following a similar approach as presented in [6]. The score is normalized by two factors: *random\_frame\_length*, set to 2880, and *expert\_frame\_length*, set to 1812. A higher score is achieved by minimizing the time required to destroy the crystal.

In addition, we have generated violin charts to represent the distribution of episode returns in each dataset as shown in Fig. 3. We calculate episode returns using the formula  $R = \sum_{t=0}^T \gamma^t r^t$ , where gamma is set to 1.0 to showcase the overall rewards obtained throughout an entire episode. For the *Sub-Task: Destroy Turret* datasets of HoK1v1, we have normalized the scores based on Equation 1. The violin charts demonstrate the diverse distribution of episode returns within our datasets.

Table 3: Details of datasets in HoK1v1 game mode

| Factors          | Datasets/Experiments | Capacity | Heroes     | Oppo_heroes | Win_rate | Levels |
|------------------|----------------------|----------|------------|-------------|----------|--------|
| Multi-Difficulty | norm_poor            | 1000     | default    | default     | 12%      | 1      |
|                  | norm_medium          | 1000     | default    | default     | 50%      | 1      |
|                  | norm_expert          | 1000     | default    | default     | 88%      | 1      |
|                  | norm_mixed           | 1000     | default    | default     | 50%      | 1      |
|                  | hard_poor            | 1000     | default    | default     | 6%       | 5      |
|                  | hard_medium          | 1000     | default    | default     | 50%      | 5      |
|                  | hard_expert          | 1000     | default    | default     | 84%      | 5      |
|                  | hard_mixed           | 1000     | default    | default     | 45%      | 5      |
| Generalization   | hard_general         | 1000     | default    | default     | 90%      | 5      |
|                  | norm_general         | 1000     | default    | default     | 46%      | 1      |
|                  | norm_hero_general    | -        | multi_hero | default     | -        | 1      |
|                  | hard_hero_general    | -        | multi_hero | default     | -        | 5      |
|                  | norm_oppo_general    | -        | default    | multi_hero  | -        | 1      |
|                  | hard_oppo_general    | -        | default    | multi_hero  | -        | 5      |
| Multi-Task       | norm_multi_level     | 1000     | default    | default     | 50%      | 1      |
|                  | hard_multi_level     | 1000     | default    | default     | 50%      | 5      |
|                  | norm_multi_hero      | 1000     | multi_hero | default     | 23%      | 1      |
|                  | norm_multi_oppo      | 1000     | default    | multi_hero  | 77%      | 1      |
|                  | norm_multi_hero_oppo | 1000     | multi_hero | multi_hero  | 50%      | 1      |

Table 4: Details of datasets in *Sub-Task: Destroy Turret*

| Factors  | Datasets/Experiments  | Capacity | Heroes  | Oppo_heroes | Average Score | Levels |
|----------|-----------------------|----------|---------|-------------|---------------|--------|
| Sub-Task | destroy_turret_medium | 100      | default | no          | 0.55          | medium |
|          | destroy_turret_expert | 100      | default | no          | 1.00          | expert |
|          | destroy_turret_mixed  | 100      | default | no          | 0.73          | -      |

$$normalized\_sub\_task\_score = \frac{random\_frame\_length - frame\_length}{random\_frame\_length - expert\_frame\_length} \quad (1)$$

## C.2 HoK3v3

Table 5 presents the details of datasets in HoK3v3 game mode. The datasets are designed based on the design factors and collected by recording the battle trajectories of pre-trained models as described in Sec F. Typically, each dataset has a capacity of 1000 trajectories. The default heroes chosen for both camps are  $\{\{zhaoyun\}, \{diaochan\}, \{liyuanfang\}\}$ , with their Summoner Spells assigned as  $\{\{smite\}, \{purify\}, \{purify\}\}$  based on their respective roles. However, in specific scenarios such as

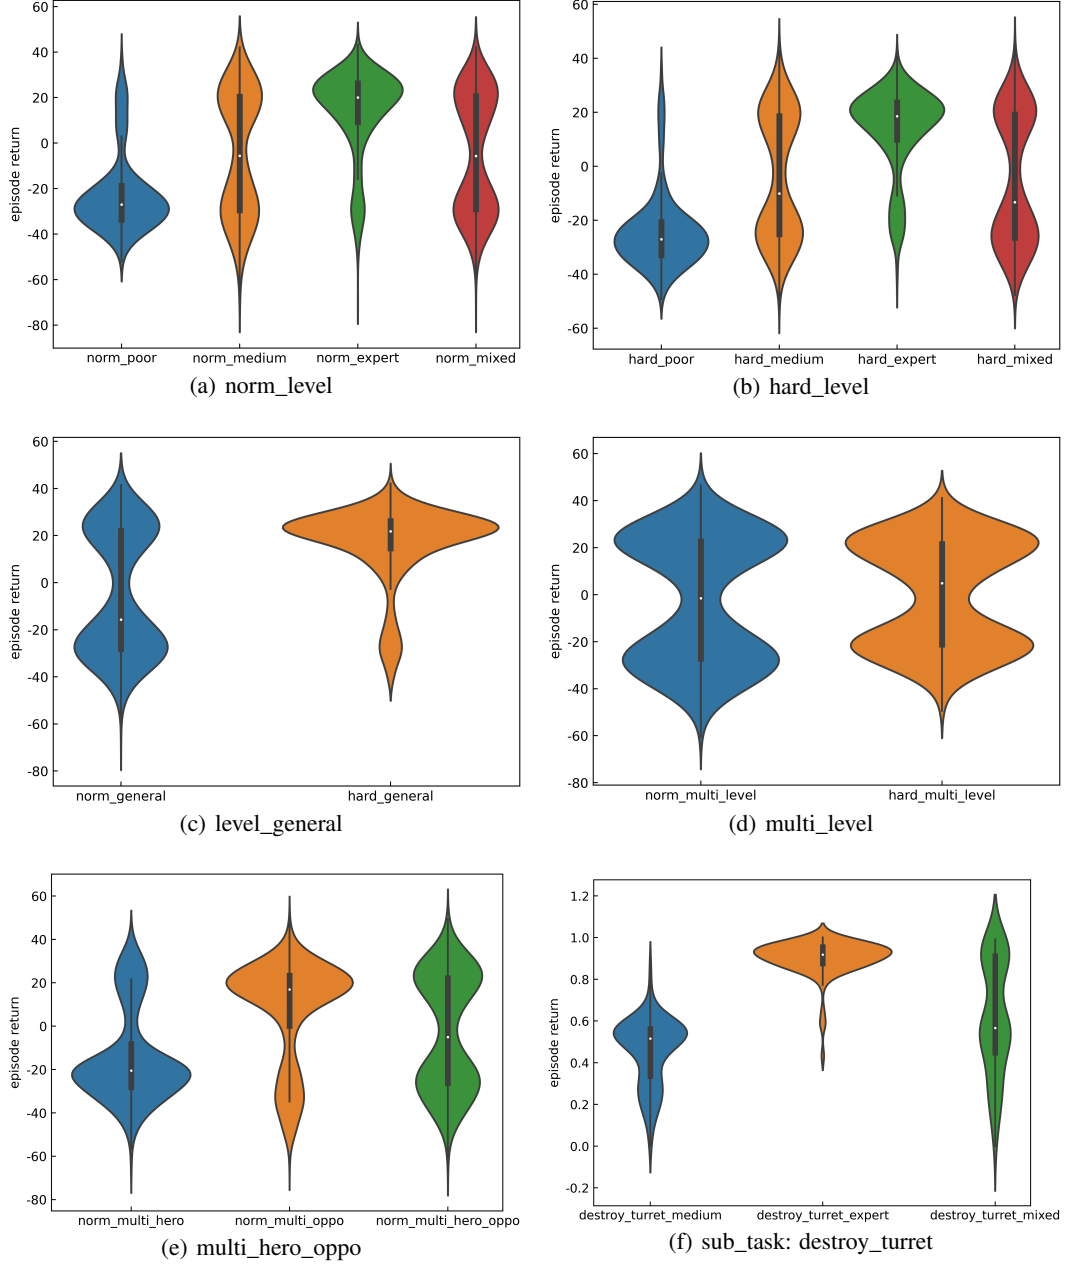

Figure 3: Violin diagrams of all datasets in HoK1v1.

571 *Generalization* or *Multi-Task* settings, we employ a random selection of heroes from a predefined set,  
572 *multi\_hero*. This set comprises six heroes, with two heroes assigned to each role, namely  $\{\{zhaoyun,$   
573  $zhongwuyan\}, \{diaochan, zhugeliang\}, \{liyuanfang, sunshangxiang\}\}$ , with same Summoner Spells  
574 setting as in the *default* setup. Similarly, the win rate of the behavior policy is recorded in the column  
575 labeled *Win\_rate* for reference. The column labeled *Levels* denotes the levels of opponents used for  
576 evaluation. Generally, a level of "1" is used for datasets with the "norm" prefix, while a level of "7" is  
577 used for datasets with the "hard" prefix. This distinction indicates varying levels of difficulty. The  
578 design of datasets and experiments pertaining to the concept of *Generalization* closely resembles that  
579 of the HoK1v1.

We introduce a sub-task called "*Gain Gold*" that builds upon the HoK3v3 game. In this modified version, we remove opponents and redefine the primary objective to focus on collecting gold within a limited number of time steps. This transforms the original competitive task into a resource collection task. Specifically, we set a maximum episode length of 8000 frames, and the controlled heroes are required to efficiently gather gold by killing monsters or creeps. As demonstrated in Table 6, we generate three datasets based on this sub-task, each consisting of 100 trajectories. The *gain\_gold\_medium* dataset is collected by a model with moderate performance, averaging 5904 gold collected. While, the *gain\_gold\_expert* dataset is obtained from a model with expert performance, averaging 12271 gold collected. Lastly, the *gain\_gold\_mixed* dataset combines the data from the previous two datasets equally. The scores are normalized based on Equation 2, where the *random\_gain\_gold* is 5000 and *expert\_gain\_gold* is 12000.

We have also generated violin charts in HoK3v3 to represent the distribution of episode returns in each dataset as shown in Fig. 4. The plot method used is similar to that in HoK1v1, with the exception of not using normalized scores in the *Sub-Task: Gain Gold*.

$$normalized\_sub\_task\_score = \frac{gain\_gold - random\_gain\_gold}{expert\_gain\_gold - random\_gain\_gold} \quad (2)$$

Table 5: Details of datasets in HoK3v3 game mode

| Factors          | Datasets/Experiments | Capacity | Heroes     | Oppo_heroes | Win_rate | Levels |
|------------------|----------------------|----------|------------|-------------|----------|--------|
| Multi-Difficulty | norm_poor            | 1000     | default    | default     | 16%      | 1      |
|                  | norm_medium          | 1000     | default    | default     | 50%      | 1      |
|                  | norm_expert          | 1000     | default    | default     | 82%      | 1      |
|                  | norm_mixed           | 1000     | default    | default     | 49%      | 1      |
|                  | hard_poor            | 1000     | default    | default     | 18%      | 7      |
|                  | hard_medium          | 1000     | default    | default     | 50%      | 7      |
|                  | hard_expert          | 1000     | default    | default     | 83%      | 7      |
|                  | hard_mixed           | 1000     | default    | default     | 51%      | 7      |
| Generalization   | hard_general         | 1000     | default    | default     | 94%      | 8      |
|                  | norm_general         | 1000     | default    | default     | 57%      | 5      |
|                  | norm_hero_general    | -        | multi_hero | default     | -        | 1      |
|                  | hard_hero_general    | -        | multi_hero | default     | -        | 7      |
|                  | norm_oppo_general    | -        | default    | multi_hero  | -        | 1      |
|                  | hard_oppo_general    | -        | default    | multi_hero  | -        | 7      |
| Multi-Task       | norm_multi_level     | 1000     | default    | default     | 50%      | 1      |
|                  | hard_multi_level     | 1000     | default    | default     | 50%      | 7      |
|                  | norm_multi_hero      | 1000     | multi_hero | default     | 74%      | 1      |
|                  | norm_multi_oppo      | 1000     | default    | multi_hero  | 26%      | 1      |
|                  | norm_multi_hero_oppo | 1000     | multi_hero | multi_hero  | 50%      | 1      |
| Heterogeneous    | norm_stupid_partner  | 1000     | default    | default     | 50%      | 1      |
|                  | norm_expert_partner  | 1000     | default    | default     | 50%      | 1      |
|                  | norm_mixed_partner   | 1000     | default    | default     | 50%      | 1      |

Table 6: Details of datasets in *Sub-Task: Gain Gold*

| Factors  | Datasets         | Capacity | Heroes  | Oppo_heroes | Average Score | Levels |
|----------|------------------|----------|---------|-------------|---------------|--------|
| Sub-Task | gain_gold_medium | 100      | default | no          | 0.13          | medium |
|          | gain_gold_expert | 100      | default | no          | 1.04          | expert |
|          | gain_gold_mixed  | 100      | default | no          | 0.58          | -      |

Table 7: Details of sampling *generalization* datasets.

| Environments | Datasets     | Sampling and Training |                     | Testing             |
|--------------|--------------|-----------------------|---------------------|---------------------|
|              |              | Controlled side model | Opponent side model | Opponent side model |
| HoK1v1       | norm_general | level-1               | level-0,2,4         | level-1             |
|              | hard_general | level-5               | level-0,2,4         | level-5             |
| HoK3v3       | norm_general | level-5               | level-1,4,7         | level-5             |
|              | hard_general | level-8               | level-1,4,7         | level-8             |

## D Environment Details

### D.1 Honor of Kings Arena

For a more detailed account of the game settings, please refer to the original paper [38] and its documentation<sup>6</sup> of Honor of Kings Arena. In this context, we will only summarize the critical information that is relevant to the RL research.

#### • Observation Space

We have utilized the fundamental set of observations presented in the aforementioned paper [38]. Specifically, the observation space of Honor of Kings Arena consists of a normalized vector with 725 dimensions, which includes five main components: *hero\_state\_common\_feature*, *hero\_private\_feature*, *creep\_feature*, *turret\_feature*, and *global\_feature*. The details of the observation vector are demonstrated in Table 8. In the table, *Main\_camp* and *Enemy\_camp* refer to the information of the controlled side and enemy side, respectively. Moreover, the information of invisible units is set to the default value.

Table 8: Details of observation vector in Honor of Kings Arena

| feature name                         | dimensions | description                                                                       |
|--------------------------------------|------------|-----------------------------------------------------------------------------------|
| Main_camp_hero_state_common_feature  | 102        | hero’s status, including whether it’s alive, its ID and its health points (HP)    |
| Main_camp_hero_private_feature       | 133        | hero’s specific kill information                                                  |
| Enemy_camp_hero_state_common_feature | 102        | enemy hero’s status, including whether it’s alive, its ID, its health points (HP) |
| Enemy_camp_hero_private_feature      | 133        | enemy hero’s specific kill information                                            |
| Public_feature                       | 14         | visible information because of the turret                                         |
| Main_camp_soldier_feature            | 18*4       | the status of the creeps in a troop, including location and HP                    |
| Enemy_camp_soldier_feature           | 18*4       | the status of the enemy’s creeps in a troop, including location and HP            |
| Main_camp_organ_feature              | 18*2       | the status of turret and crystal                                                  |
| Enemy_camp_organ_feature             | 18*2       | the status of enemy’s turret and crystal                                          |
| Global_feature                       | 25         | the period of the match                                                           |

• **Action Space** To tackle the complicated control, the Honor of Kings adopt a structured action space. Specifically, illustrated in Fig. 5 the action space is 6 dimensions, consisting of a triplet form, i.e. the action button, the movement or skill offset and the target game unit, which covers all the possible actions of the hero hierarchically: 1) what action button to take, e.g. skill or move.; 2) who to target,

<sup>6</sup><https://aiarena.tencent.com/hok/doc/>

e.g., a turret, an enemy hero, or a creep in the troop; 3) how to act, e.g., the discretized direction to move and release skills [38]. Please refer to Table 9 for details of action space in HoK1v1.

Table 9: Description of action space in HoK1v1

| Action Class | Numbers | Description                                     |
|--------------|---------|-------------------------------------------------|
| Button       | 12      | what action button to take, e.g. skill or move. |
| Move X       | 16      | move direction along X-axis.                    |
| Move Y       | 16      | move direction along Y-axis.                    |
| Skill X      | 16      | skill offset along X-axis.                      |
| Skill Y      | 16      | skill offset along Y-axis.                      |
| Target       | 8       | who to target, e.g., a turret or an enemy hero  |

• **Action Mask** There are two action masks designed to reduce the complexity of the action space, namely the *legal\_action\_mask* and the *sub\_action\_mask*. The former is constructed based on the rules of the game in order to exclude illegal actions, while the latter is determined by the selected button to eliminate actions that cannot be executed simultaneously with the chosen button, such as 'skill offset' and 'target unit' are not needed for 'move'.

• **Reward Design** The basic hero reward is a weighted average of several reward items, which is demonstrated in Equation 3. Subsequently, the hero's reward is transformed into a zero\_sum value by subtracting the enemy's reward from it, as shown in Equation 4. Here, *team\_reward* represents the average reward of the heroes within the team. Details of the reward items are demonstrated in Table 10.

$$hero\_reward = w_1 * farming\_related + w_2 * KDA\_related + w_3 * damage\_related + w_4 * pushing\_related + w_5 * win/lose\_related \quad (3)$$

$$hero\_reward_{zero\_sum} = hero\_reward - team\_reward_{enemy} \quad (4)$$

Table 10: Description of reward items in HoK1v1

| Items          | Type   | Description                       |
|----------------|--------|-----------------------------------|
| hp_point       | dense  | the rate of health point of hero  |
| tower_hp_point | dense  | the rate of health point of tower |
| money          | dense  | the increment of gold             |
| ep_rate        | dense  | the rate of mana point            |
| death          | sparse | being killed                      |
| kill           | sparse | killing an enemy hero             |
| exp            | dense  | the increment of experience       |
| last_hit       | sparse | the 1st hit for soldier           |

## D.2 Honor of Kings 3v3 Arena

For a more detailed account of the game settings, please refer to the documentation of Honor of Kings 3v3 Arena (HoK3v3) <sup>7</sup>. The environment code of HoK3v3 is integrated into the open-source 1v1 code, both with official authorization from Honor of Kings <sup>8</sup>.

• **Observation Space** Specifically, the observation space of HoK3v3 consists of a normalized vector with 4586 dimensions. The details of observation vector are presented in Table 11.

• **Action Space** The form of action space in HoK3v3 is similar to that in HoK1v1 while the number of actions is larger. Description of action space in HoK3v3 is presented in Table 12.

<sup>7</sup>[https://doc.aiarena.tencent.com/paper/hok3v3/latest/hok3v3\\_env/honor-of-kings/](https://doc.aiarena.tencent.com/paper/hok3v3/latest/hok3v3_env/honor-of-kings/)

<sup>8</sup>[https://github.com/tencent-ailab/hok\\_env](https://github.com/tencent-ailab/hok_env)

Table 11: Details of observation vector in HoK3v3.

| feature name      | dimensions | description                                                                                     |
|-------------------|------------|-------------------------------------------------------------------------------------------------|
| FeatureImgLikeMg  | 6*17*17    | image-like feature, comprising six channels, which include barriers, grass, and other elements. |
| VecFeatureHero    | 6*251      | the status of six heroes from the respective of controlled hero.                                |
| MainHeroFeature   | 44         | private information of controlled hero.                                                         |
| VecSoldier        | 20*25      | the status of all creeps.                                                                       |
| VecOrgan          | 6*29       | the status of turrets and crystals in both side.                                                |
| VecMonster        | 20*28      | the status of all monsters.                                                                     |
| VecCampsWholeInfo | 68         | the status feature of the whole game.                                                           |

Table 12: Description of action space in HoK3v3

| Action Class | Numbers | Description                                     |
|--------------|---------|-------------------------------------------------|
| Button       | 13      | what action button to take, e.g. skill or move. |
| Move         | 25      | move direction.                                 |
| Skill X      | 42      | skill offset along X-axis.                      |
| Skill Y      | 42      | skill offset along Y-axis.                      |
| Target       | 39      | who to target, e.g., a turret or an enemy hero  |

633 • **Reward Design** The basic hero reward is a weighted average of several reward items. Then the  
634 reward of each hero is processed to be zero\_sum in minus the team reward of enemy which is the  
635 average of the hero rewards of 3 enemy heroes. The details of reward items are demonstrated in  
Table 13

Table 13: Description of reward items in HoK3v3

| Items              | Type   | Description                                         |
|--------------------|--------|-----------------------------------------------------|
| hp_rate_sqrt_sqrt  | dense  | the fourth root of the rate of health point of hero |
| money              | dense  | the increment of gold                               |
| exp                | dense  | the increment of experience                         |
| tower              | dense  | the rate of health point of turrets                 |
| killCnt            | sparse | kill an enemy                                       |
| assistCnt          | sparse | assisting in the termination of an adversary        |
| deadCnt            | sparse | being killed                                        |
| total_hurt_to_hero | dense  | damage dealt to the enemies                         |
| atk_monster        | dense  | attack an monster                                   |
| atk_crystal        | dense  | attack the crystal of enemy                         |
| win_crystal        | sparse | destroy the crystal of enemy                        |

636

## 637 E Framework APIs

638 We provide an example of the APIs in our framework, Listing 1. A comprehensive account of our  
639 framework can be found in our readily accessible open-access code repository.

## F Evaluation Protocols: Multi-Level Models

Based on the parallel training system named **SAIL** proposed by previous work [45], we have extracted and published several checkpoints from pre-trained dual-clip PPO [45, 44] models with varying levels determined by the outcome of the battle separately for HoK1v1 and HoK3v3.

Here, we present tables displaying the win rate of each level model against the model listed directly below it. The win rate is calculated with fixed hero selection, i.e. *luban* for HoK1v1 and *{zhaoyun,diaochan,liyuanfang}* for HoK3v3, which may not right for other hero selection. Table 14 presents the win rate in the HoK1v1, where the *win\_rate* column represents the win rate of *model1* against *model2*. Table 15 displays the win rate in HoK3v3. Additionally, we have included an API in our framework that allows researchers to conveniently test the win rate between any levels.

Table 14: Win rate of multi-level models in HoK1v1

| model1      | model2      | win_rate |
|-------------|-------------|----------|
| 1v1_level_1 | 1v1_level_0 | 88%      |
| 1v1_level_2 | 1v1_level_1 | 79%      |
| 1v1_level_3 | 1v1_level_2 | 59%      |
| 1v1_level_4 | 1v1_level_3 | 97%      |
| 1v1_level_5 | 1v1_level_4 | 70%      |
| 1v1_level_6 | 1v1_level_5 | 73%      |
| 1v1_level_7 | 1v1_level_6 | 70%      |

Table 15: Win rate of multi-level models in HoK3v3

| model1      | model2      | win_rate |
|-------------|-------------|----------|
| 3v3_level_1 | 3v3_level_0 | 97%      |
| 3v3_level_2 | 3v3_level_1 | 83%      |
| 3v3_level_3 | 3v3_level_2 | 50%      |
| 3v3_level_4 | 3v3_level_3 | 65%      |
| 3v3_level_5 | 3v3_level_4 | 63%      |
| 3v3_level_6 | 3v3_level_5 | 59%      |
| 3v3_level_7 | 3v3_level_6 | 80%      |
| 3v3_level_8 | 3v3_level_7 | 82%      |

## G Additional Experimental Details

### G.1 Additional Algorithm Details

- **Encoder:** Due to the complexity of the observation space, it is necessary to utilize a well-designed encoder for effective feature extraction. Taking inspiration from the "divide and conquer" approach employed in previous works [45, 44], in each algorithm, we implement a shared encoder network to process features, instead of directly feeding raw observations into the policy or critic network. For further details on the design of the encoder network, please refer to the mentioned papers [45, 44] as well as our code.

- **BC:** Behavior clone with maximum likelihood estimation loss. While, in multi-agent setting, HoK3v3, we adopt shared parameter and independent learning paradigm [34].

- **CQL** [19]: The implementation of Conservative Q-Learning is based on the original version [19] designed for discrete action spaces<sup>9</sup>.

- **QMIX+CQL:** Due to the decoupling of control dependencies [45], the action space of HoK is structured with multi-head, which is similar to the joint action space in multi-agent settings. Inspired

<sup>9</sup><https://github.com/aviralkumar2907/CQL/tree/master/atari>

by this, we propose QMIX-CQL by incorporating mixer in QMIX [29] with CQL and use global Q to calculate td error term and use local Q to calculate CQL-loss term.

- **TD3+BC** [7]: Our implementation of TD3-BC is based on the open-source code<sup>10</sup>. In addition, the policy network and critic network share an encoder, which is updated simultaneously by both losses. Besides, We utilize Gumbel-Softmax reparameterization method to generate discrete actions for TD3 [8].

- **IQL** [16]: We implement IQL based on the open-source pytorch version<sup>11</sup>. The network design is similar to TD3-BC except for an additional value network.

- **IND+CQL** and **COMM+CQL**: To accommodate a multi-agent setting, based on the implementation of CQL, we adopt the independent learning paradigm and shared parameters, referred to as IND-CQL. Additionally, we introduce COMM-CQL which adds communication between agents by means of shared information that is constructed using max pooling.

- **IND+ICQ** and **MAICQ** [43]: We implement IND+ICQ and MAICQ based on the original published code<sup>12</sup>. IND+ICQ adopts independent learning paradigm, while MAICQ adopts CTDE paradigm by decomposing the joint-policy under the implicit constraint. The actor and critic networks update the shared encoder simultaneously as TD3-BC.

- **OMAR** [28]: The open-access code<sup>13</sup> of OMAR is not suitable for a discrete action space. Consequently, based on the core idea of it, we have undertaken the task of re-implementing OMAR to accommodate a discrete version.

## G.2 Hyperparameters

We have compiled the hyperparameters of HoK1v1 and HoK3v3 in Tables 16 and 17, respectively. These tables encompass the parameters of the training process, algorithm and optimizer settings.

Regarding the computing resources employed in HoK1v1, we utilize the Tesla T4 GPU and the AMD EPYC 7K62 48-Core Processor CPU. For the sampling process, 50 CPU cores are utilized, and each dataset required approximately 30 to 40 minutes for sampling. During the training process, each training experiment is conducted with one Tesla T4 GPU and two CPU cores, with an average training time of 9 hours per seed for 500000 training steps.

Regarding the computing resources employed in HoK3v3, we utilize the Tesla T4 GPU and the AMD EPYC 7K62 48-Core Processor CPU. For the sampling process, 50 CPU cores are utilized, and each dataset required approximately 80-90 minutes for sampling. During the training process, each training experiment is conducted with one Tesla T4 GPU and four CPU cores, with an average training time of 20 hours per seed for 500000 training steps.

Consequently, a total of 14 GPUs and 552 CPU cores are used to accommodate the overall computation requirements.

## G.3 Additional Results Discussion

### • Why is the performance of baseline models in the HoK1v1 comparatively inferior to those in the HoK3v3 setting?

The experimental results conducted in the HoK1v1 reveal that the performance of baseline models is comparatively inferior to those in the HoK3v3 setting. This disparity can be attributed to the higher level of adversarial conditions present in the HoK1v1 environment. Furthermore, within the context of HoK3v3, if one teammate makes a sacrifice during a battle, the remaining two teammates are able

<sup>10</sup>[https://github.com/sfujim/TD3\\_BC](https://github.com/sfujim/TD3_BC)

<sup>11</sup><https://github.com/gwthomas/IQL-PyTorch>

<sup>12</sup><https://github.com/YiqinYang/ICQ/tree/5a4da859ef597005040f79128ee6163547cf178d>

<sup>13</sup><https://github.com/ling-pan/OMAR>

Table 16: Hyperparameters for HoK1v1. The values of hyperparameters for algorithms are derived from their original implementation.

| Hyperparameters                              | Value    |
|----------------------------------------------|----------|
| Batch Size                                   | 128      |
| $\gamma$                                     | 0.99     |
| Max Steps (Exclude <i>Sub-Task</i> Datasets) | 500000   |
| Max Steps ( <i>Sub-Task</i> Datasets)        | 100000   |
| LSTM Time Steps                              | 16       |
| $\tau$ (Soft-Target-Update)                  | 0.005    |
| num_threads                                  | 2        |
| final_evaluation_episodes                    | 150      |
| CQL $\alpha$                                 | 10.0     |
| TD3+BC $\alpha$                              | 2.5      |
| IQL $\tau$                                   | 0.7      |
| IQL $\beta$                                  | 3.0      |
| Optimizer                                    | Adam     |
| beta1                                        | 0.9      |
| beta2                                        | 0.999    |
| eps                                          | 1.00E-08 |
| Learning Rate                                | 3.00E-04 |

Table 17: Hyperparameters for HoK3v3. The values of hyperparameters for algorithms are derived from their original implementation.

| Hyperparameters               | Value    |
|-------------------------------|----------|
| Batch Size                    | 512      |
| $\gamma$                      | 0.99     |
| Hard Update Frequency         | 2000     |
| Max Steps                     | 500000   |
| Max Steps ( <i>Sub-Task</i> ) | 100000   |
| Iteration Steps               | 1000     |
| Buffer Workers                | 2        |
| num_threads                   | 4        |
| final_evaluation_episodes     | 150      |
| CQL $\alpha$                  | 10.0     |
| ICQ critic $\beta$            | 1000     |
| ICQ policy $\beta$            | 0.1      |
| OMAR coe                      | 0.5      |
| Optimizer                     | Adam     |
| beta1                         | 0.9      |
| beta2                         | 0.999    |
| eps                           | 1.00E-08 |
| Learning Rate                 | 1.00E-04 |

to maintain their collaboration and continue to fight. This aspect ensures a greater level of robustness in the HoK3v3 when compared to the HoK1v1.

- **What are the reasons behind the underperformance of TD3+BC and OMAR?**

TD3+BC and OMAR demonstrated subpar performance in HoK1v1 and HoK3v3, respectively. The main cause of their lackluster outcomes stems from the fact that TD3 [8], upon which TD3+BC and OMAR are built, is incompatible with discrete action spaces. To enhance OMAR’s performance, we replaced TD3 with advantage-weighted BC. This modification resulted in performance improvements.

- **QMIX+CQL in HoK3v3.**

We also implemented **QMIX+CQL** in the HoK3v3 game mode by adopting an independent learning paradigm. We thoroughly validated the performance of **QMIX+CQL** and compared it with **IND+BC** and **IND+CQL**, aggregating the results in Table 18. It is demonstrated that **QMIX+CQL** exhibits superior performance compared to **IND+CQL**, indicating that our novel method is also suitable for multi-agent settings with a structured action space.

Table 18: Validation of **QMIX+CQL** in HoK3v3 game mode.

| Factors        | Datasets                | IND+BC           | IND+CQL   | QMIX+CQL         |
|----------------|-------------------------|------------------|-----------|------------------|
| Multi-Level    | norm_poor               | 0.1±0.01         | 0.03±0.01 | <b>0.11±0.03</b> |
|                | norm_medium             | 0.48±0.01        | 0.4±0.03  | <b>0.52±0.04</b> |
|                | norm_expert             | 0.52±0.03        | 0.84±0.06 | <b>0.85±0.04</b> |
|                | norm_mixed              | 0.35±0.25        | 0.46±0.12 | <b>0.47±0.29</b> |
|                | hard_poor               | <b>0.16±0.03</b> | 0.12±0.03 | 0.13±0.02        |
|                | hard_medium             | <b>0.38±0.05</b> | 0.31±0.02 | 0.37±0.08        |
|                | hard_expert             | 0.65±0.01        | 0.67±0.04 | <b>0.7±0.03</b>  |
|                | hard_mixed              | 0.32±0.14        | 0.3±0.1   | <b>0.43±0.04</b> |
| Generalization | norm_general            | <b>0.34±0.05</b> | 0.29±0.09 | <b>0.34±0.02</b> |
|                | hard_general            | 0.28±0.03        | 0.28±0.04 | <b>0.32±0.01</b> |
|                | norm_multi_hero_general | 0.17±0.03        | 0.14±0.04 | <b>0.18±0.06</b> |
|                | hard_multi_hero_general | 0.16±0.05        | 0.17±0.02 | <b>0.19±0.02</b> |
|                | norm_multi_oppo_general | <b>0.21±0.01</b> | 0.14±0.04 | 0.14±0.03        |
|                | hard_multi_oppo_general | 0.09±0.06        | 0.09±0.02 | <b>0.1±0.02</b>  |
| Multi-Task     | norm_multi_level        | 0.43±0.09        | 0.34±0.04 | <b>0.45±0.02</b> |
|                | hard_multi_level        | <b>0.38±0.08</b> | 0.29±0.07 | 0.35±0.04        |
|                | norm_multi_hero         | <b>0.57±0.07</b> | 0.3±0.07  | 0.56±0.13        |
|                | norm_multi_oppo         | <b>0.09±0.04</b> | 0.07±0.03 | <b>0.09±0.02</b> |
|                | norm_multi_hero_oppo    | <b>0.3±0.04</b>  | 0.26±0.07 | <b>0.3±0.03</b>  |
| Heterogeneous  | norm_stupid_partner     | 0.11±0.15        | 0.24±0.17 | <b>0.55±0.05</b> |
|                | norm_expert_partner     | 0.36±0.09        | 0.57±0.04 | <b>0.72±0.07</b> |
|                | norm_mixed_partner      | 0.49±0.2         | 0.32±0.03 | <b>0.66±0.05</b> |
| Sub_Task       | gain_gold_medium        | <b>0.13±0.01</b> | 0.12±0.01 | <b>0.13±0.02</b> |
|                | gain_gold_expert        | 1.01±0.03        | 1±0.01    | <b>1.02±0.01</b> |
|                | gain_gold_mixed         | <b>0.64±0.29</b> | 0.41±0.1  | 0.58±0.17        |

## H Additional Discussion

### H.1 The significance of our design factors in the context of offline reinforcement learning

**Task difficulty:** Intuitively, the level of difficulty in the environment significantly impacts the performance of algorithms. However, previous researches only utilized one set of datasets with a uniform level of difficulty in the environment. Providing datasets with diverse difficulty can not only

more comprehensively evaluate the ability of offline algorithms but also be more suited for real-world tasks like HoK, which are characterized by diverse levels of difficulty.

**Multi-task:** Combining offline reinforcement learning with multi-task learning enables efficient use of limited data. Sharing knowledge[1] and representations across tasks enhances data efficiency, leading to more general and robust feature learning. Besides, multi-task learning facilitates knowledge transfer between tasks. Leveraging shared parameters and representations accelerates learning for the target task in offline reinforcement learning, benefiting from related tasks’ knowledge.

**Generalization:** Firstly, in offline RL, learning is based on a fixed dataset collected from previous experiences. This dataset might not cover all possible scenarios, so the learned policy needs to generalize well to new, unseen situations to perform effectively. Secondly, real-world environments are often complex and diverse. A policy only limited to the dataset without generalizing would likely fail when facing even slightly different conditions. Generalization ensures the policy’s adaptability to various situations in the real-world scenarios.

**Heterogeneous Teammate:** Heterogeneous teammates are a crucial research direction in Multi-Agent Reinforcement Learning (MARL). In practical scenarios such as HoK or other multi-agent systems, players typically possess varying capacities. Consequently, the datasets collected from real-world scenarios consist of heterogeneous teammate data, necessitating the need for corresponding research in the offline MARL domain.

## H.2 From the perspective of the Honor of Kings game, why offline reinforcement learning is necessary and what potential limitations exist when compared to online reinforcement learning?

Training agents for the Honor of Kings game using offline reinforcement learning (RL) offers several advantages, including reduced training time, lower computation resource requirements, and better utilization of existing data resources. We compare the computational and time costs of online RL and offline RL in Table 19. It is evident that training an online agent from scratch to reach specific levels (level\_5 for HoK1v1 and level\_7 for HoK3v3) requires thousands of CPU cores and dozens of hours. On the other hand, training offline agents to reach same levels only requires a few CPUs and a shorter training time using pre-collected datasets. Additionally, there is a wealth of previously collected battle data that can be used for training offline RL agents. However, compared to online RL, it is important to note that offline RL in the HoK game heavily relies on large amounts of high-level battle data to train expert-level agents, which may be a potential limitation.

Table 19: The comparison of the computational and time costs between online RL and offline RL.

| Online/Offline   | CPU cores | GPU cores | Performance | Training time (hours) |
|------------------|-----------|-----------|-------------|-----------------------|
| HoK1v1 (online)  | 4000      | 2         | 1v1_level_5 | 60h                   |
| HoK1v1 (offline) | 2         | 1         | 1v1_level_5 | 9h                    |
| HoK3v3 (online)  | 1000      | 1         | 3v3_level_7 | 97h                   |
| HoK3v3 (offline) | 4         | 1         | 3v3_level_7 | 20h                   |

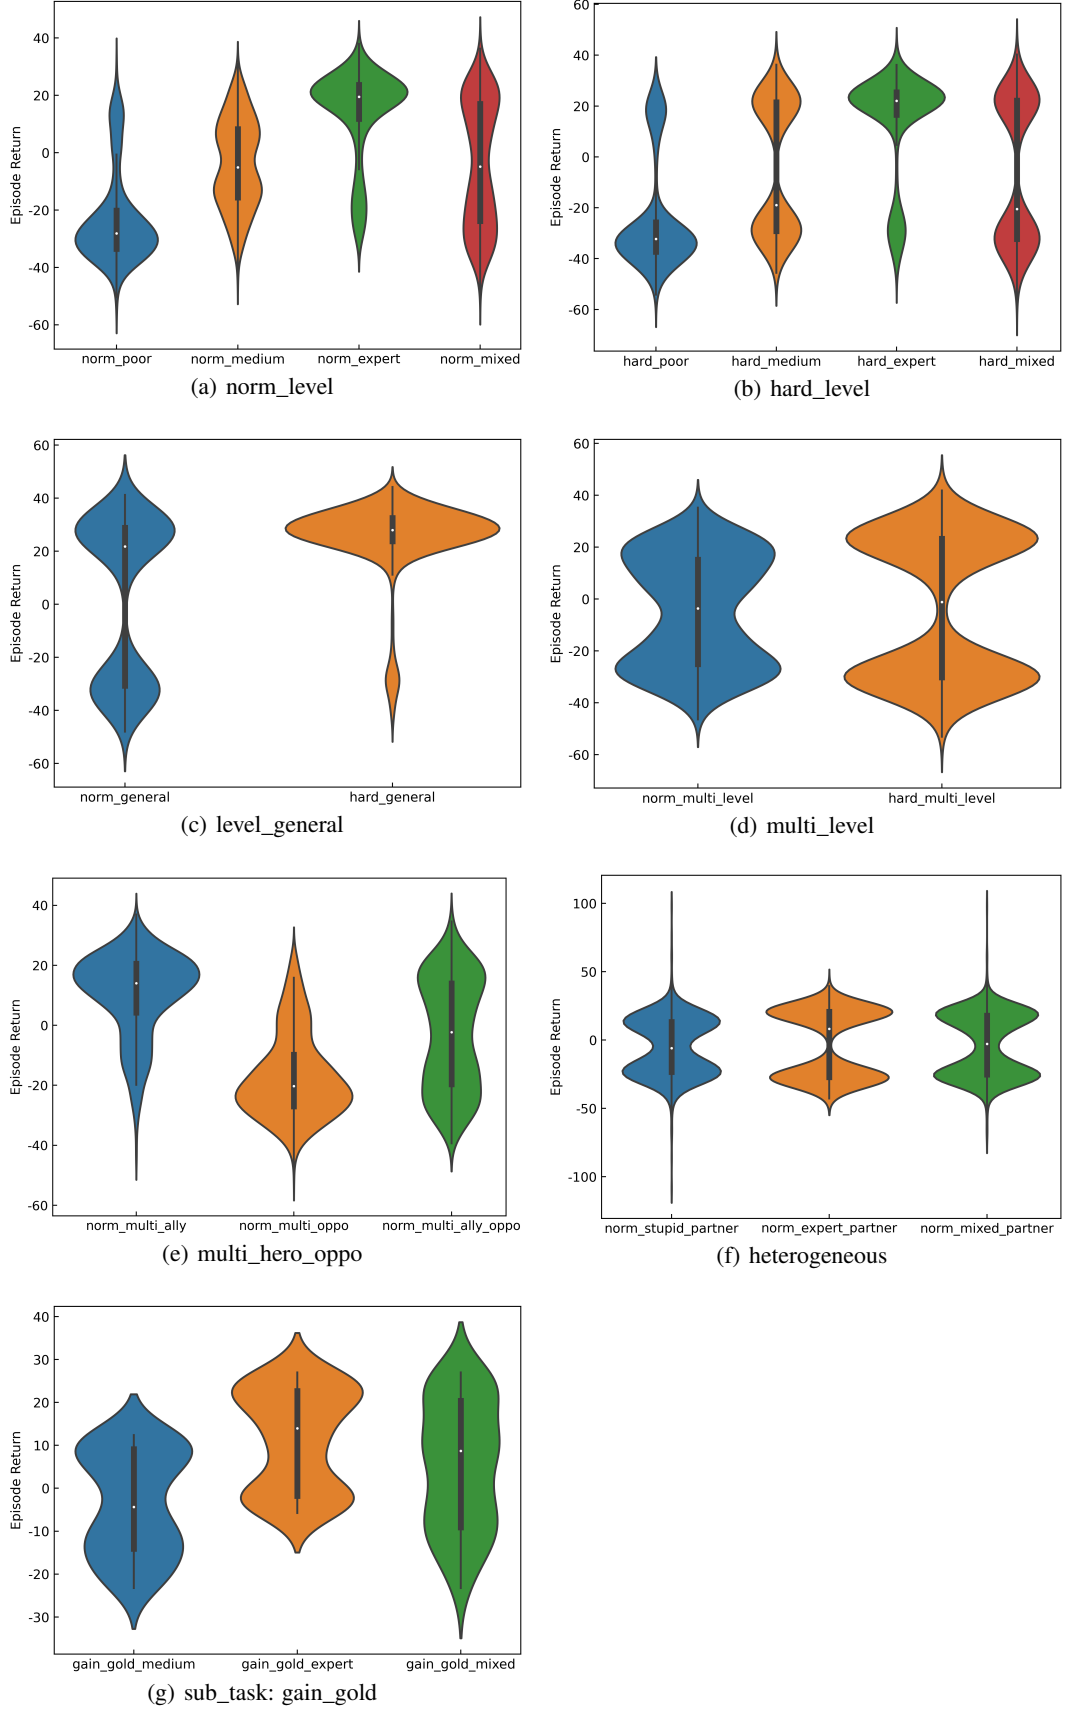

Figure 4: Violin diagrams of all datasets in HoK3v3.

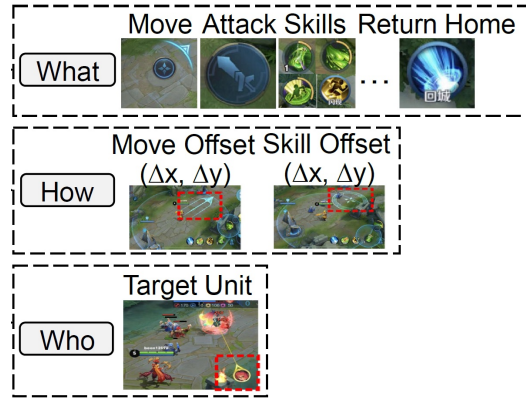

Figure 5: Action space in HoK1v1 [38]

```

1 cd <root_path>
2
3 # sample example
4 sh offline_sample/scripts/start_sample.sh <args>
5
6 # train example
7 python offline_train/train.py --<args>
8
9 # evaluate example
10 python offline_eval/evaluation.py --<args>
11

```

Listing 1: APIs example
